# Supplementary material for: Controllable fabrication of α-Ag2WO4 nanorod-clusters with superior simulated sunlight photocatalytic performance
Source: Royal Society of Chemistry journal article supplement (doi:10.1039/c8qi01025k), 2018-11-19
Supplement: c8qi01025k1.pdf [file c8qi01025k1.pdf]

## Electronic Supporting Information (ESI)

### **Controllable fabrication of Ag<sub>2</sub>WO<sub>4</sub> nanorod-clusters with outstanding simulated sunlight photocatalytic activity**

Bing-Yu Wang<sup>a</sup>, Guo-Ying Zhang<sup>a\*</sup>, Guan-Wei Cui<sup>b</sup>, Yan-Yan Xu<sup>a\*</sup>, Yue Liu<sup>a</sup>, Chun-Yan Xing<sup>a</sup>

*a Tianjin Key Laboratory of Structure and Performance for Functional Molecules; Key Laboratory of Inorganic-Organic Hybrid Functional Material Chemistry, Ministry of Education; College of Chemistry, Tianjin Normal University, Tianjin 300387, China.*

*b College of Chemistry, Chemical Engineering and Materials Science, Shandong Normal University, Jinan 250014, P. R. China.*

\* Corresponding author. Tel./Fax: +86 22 23766532

*E-mail address:* hxxyzgy@tjnu.edu.cn (G.-Y. Zhang);

hxxxyxy@tjnu.edu.cn

(Y.-Y.

Xu).

**Table S1.** The series of  $\text{Ag}_2\text{WO}_4$  samples prepared with different molar ratio of  $\text{AgNO}_3$  and  $\text{Na}_2\text{WO}_4$ .

| $\text{AgNO}_3$ dosage (mmol) | $\text{Na}_2\text{WO}_4$ dosage (mmol) | Molar ratio | Sample name | Yield (%)   |
|-------------------------------|----------------------------------------|-------------|-------------|-------------|
| 1.0                           | 0.25                                   | 1:0.25      | AWO-1:0.25  | <b>75.9</b> |
| 1.0                           | 0.5                                    | 1:0.5       | AWO-1:0.5   | <b>79.6</b> |
| 1.0                           | 2.0                                    | 1:2         | AWO-1:2     | <b>92.3</b> |
| 1.0                           | 4.0                                    | 1:4         | AWO-1:4     | <b>93.2</b> |
| 1.0                           | 5.0                                    | 1:5         | AWO-1:5     | <b>94.1</b> |

**Table S2.** The medium pH of the reaction precursor with different reactant molar ratio

| Sample    | AWO-1:0.25 | AWO-1:0.5 | AWO-1:2 | AWO-1:4 | AWO-1:5 |
|-----------|------------|-----------|---------|---------|---------|
| medium pH | 7.49       | 7.61      | 9.40    | 9.81    | 9.83    |

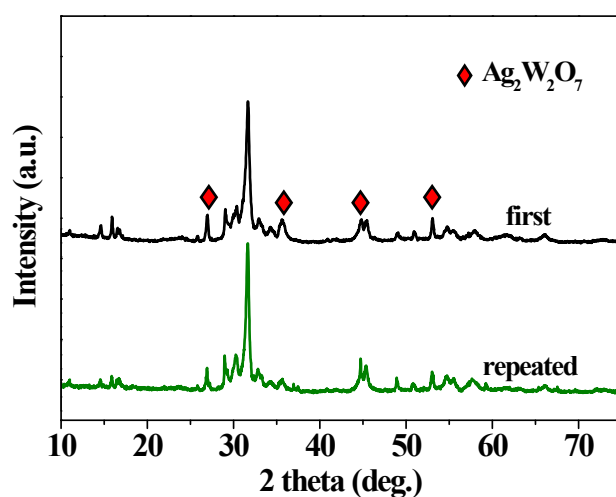

**Fig. S1** XRD patterns of the AWO-1:0.5 samples obtained by stoichiometric  $\text{AgNO}_3$  and  $\text{Na}_2\text{WO}_4$ .

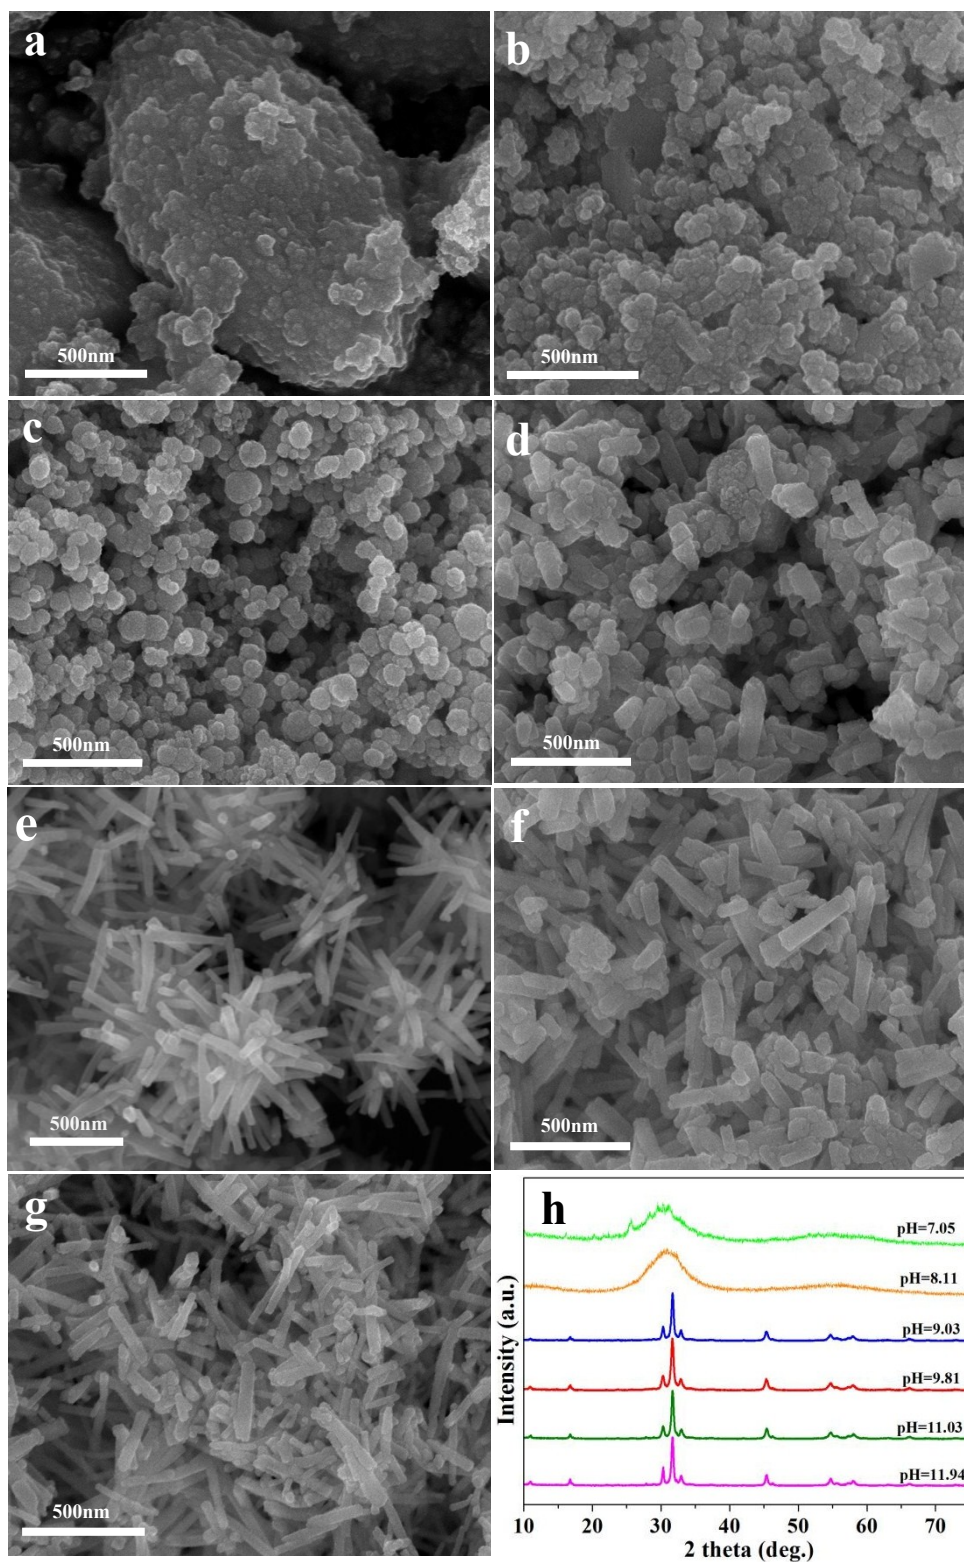

Fig. S2 SEM images of the different pH series samples based on AWO-1:4: (a) pH = 6.06, (b) pH = 7.05, (c) pH = 8.11, (d) pH = 9.03, (e) pH = 9.81, (f) pH = 11.03, (g) pH = 11.94, and (h) the corresponding XRD patterns.

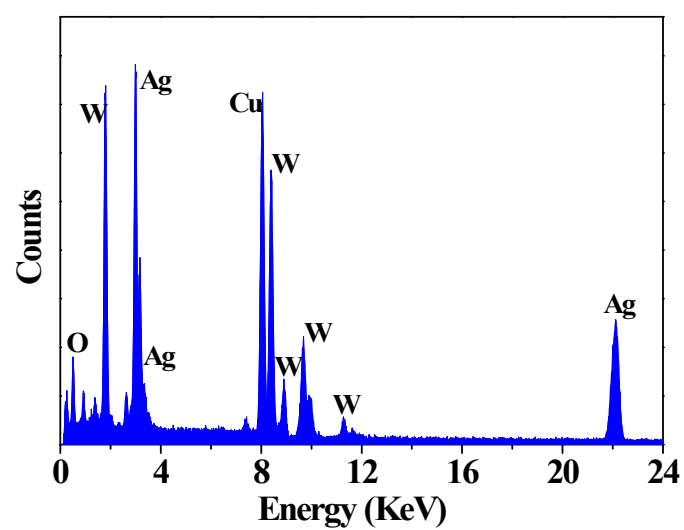

Fig. S3 EDS patterns of the AWO-1:4 sample.

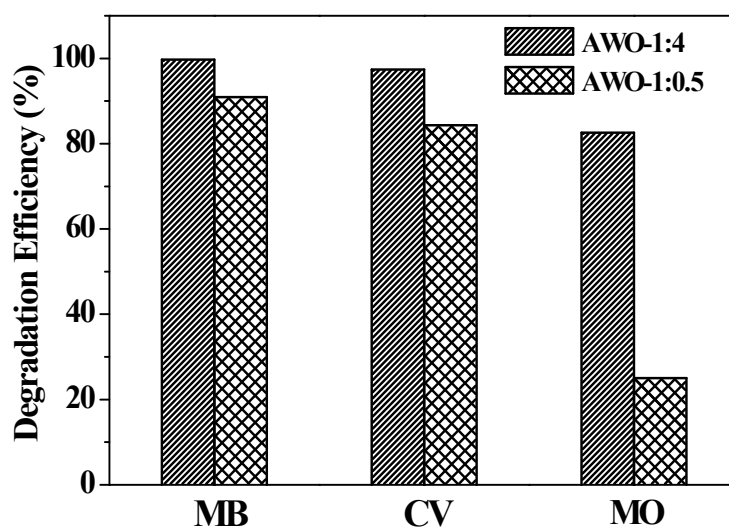

Fig. S4 comparison of photodegradation for different dyes after 50 min illumination.

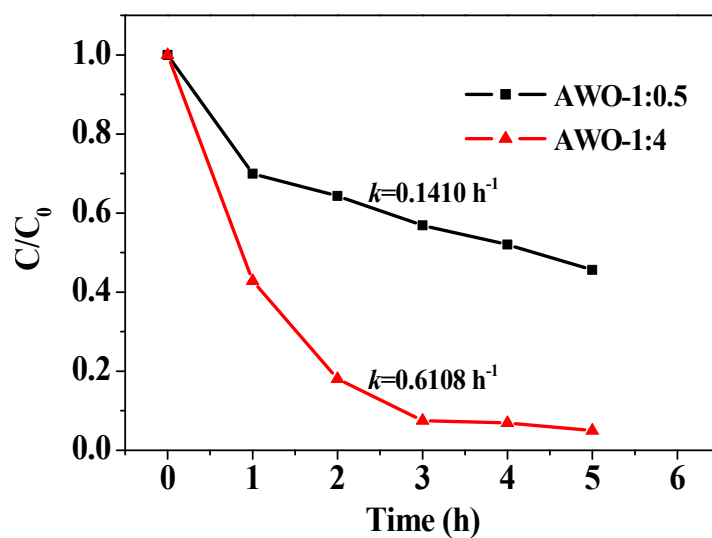

Fig. S5 Photocatalytic degradation of phenol over AWO-1:4 and AWO-1:0.5.

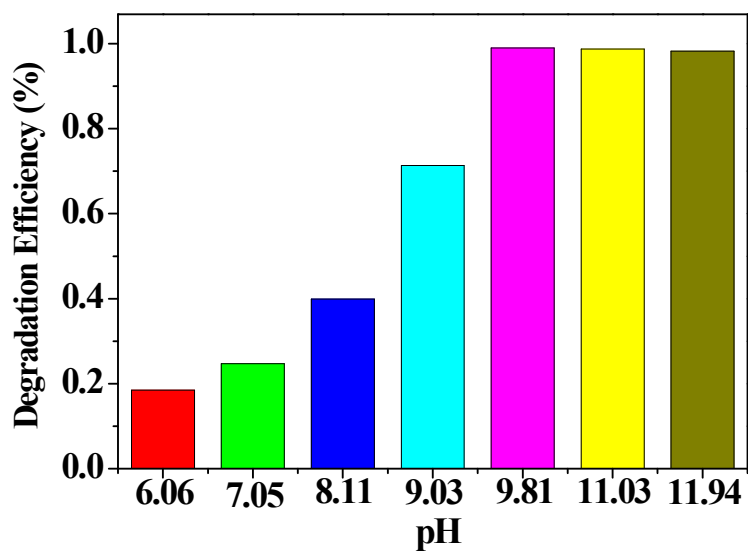

Fig. S6 Photocatalytic behavior of pH series samples for degradation of RhB solution after 50 min illumination.

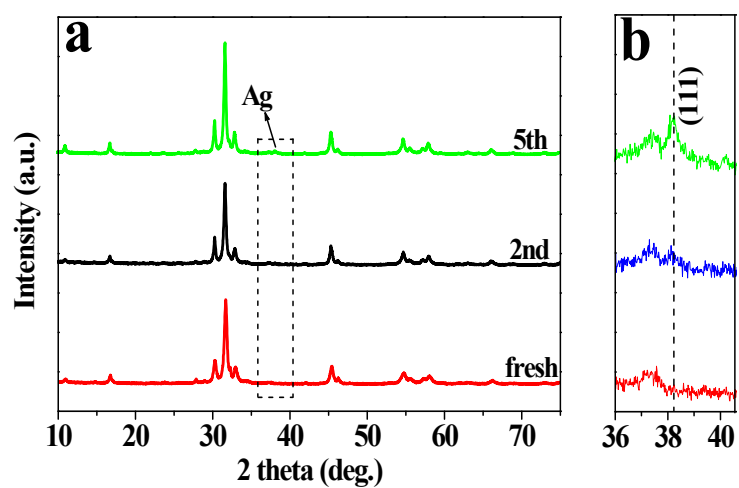

Fig. S7 (a) XRD patterns of the AWO-1:4 sample before and after repeated photocatalytic experiments; (b) enlarged diffractions positions of Ag phase.
